# Supplementary material for: Functionalized GO Membranes for Efficient Separation of Acid Gases from Natural Gas: A Computational Mechanistic Understanding
Source: MDPI journal article supplement (doi:10.3390/membranes12111155), 2022-11-16
Supplement: s1 [file s1]

# Supporting Information

## Functionalized GO membranes for efficient separation of acid gases from natural gas: a computational mechanistic understanding

Quan Liu<sup>1</sup>, Zhonglian Yang<sup>1,\*</sup>, Gongping Liu<sup>2</sup>, Longlong Sun<sup>1</sup>, Rong Xu<sup>3,\*</sup>, and Jing Zhong<sup>3</sup>

<sup>1</sup> Analytical and Testing Center, School of Chemical Engineering, Anhui University of Science and Technology, Huainan 232001, China

<sup>2</sup> State Key Laboratory of Materials-Oriented Chemical Engineering, College of Chemical Engineering, Nanjing Tech University, 30 Puzhu Road (S), Nanjing 211816, China

<sup>3</sup> Key Laboratory of Advanced Catalytic Materials and Technology, School of Petrochemical Engineering, Changzhou University, Gehu Road, 213164 Changzhou, China

\* Correspondence: zhlyang@aust.edu.cn (Z.Y.); gpliu@njtech.edu.cn (G.L.); xurong@cczu.edu.cn (R.X.)

# 1. Fitting parameters of unary isotherms with variable adsorption models

Table S1 Fitting parameters of  $\alpha$ ,  $\gamma$ ,  $\beta$ ,  $n$  and correlation coefficient ( $R^2$ ) for adsorption isotherms of different gases.

| Gases                   | $\beta$     | $\gamma$ | $n$     | $R^2$ |
|-------------------------|-------------|----------|---------|-------|
| <b>GO without PDASA</b> |             |          |         |       |
| N <sub>2</sub>          | 0.001282391 | 0.000223 | 1       | 0.999 |
| CH <sub>4</sub>         | 0.002666389 | 0.000329 |         | 0.999 |
| CO <sub>2</sub>         | 3.390677    | 1.56608  | 0.90293 | 0.994 |
| H <sub>2</sub> S        | 3.859465    | 1.49488  | 0.91607 | 0.995 |
| <b>GO-1.5wt% PDASA</b>  |             |          |         |       |
| N <sub>2</sub>          | 0.003777    | 0.00138  | 1       | 0.999 |
| CH <sub>4</sub>         | 0.011565    | 0.00379  |         | 0.999 |
| CO <sub>2</sub>         | 4.295758    | 1.56059  | 0.90492 | 0.997 |
| H <sub>2</sub> S        | 4.731904    | 1.16065  | 0.96424 | 0.992 |
| <b>GO-3.0wt% PDASA</b>  |             |          |         |       |
| N <sub>2</sub>          | 0.003449    | 0.00126  | 1       | 0.999 |
| CH <sub>4</sub>         | 0.010963    | 0.00343  |         | 0.999 |
| CO <sub>2</sub>         | 4.518861    | 2.49722  | 0.82063 | 0.992 |
| H <sub>2</sub> S        | 5.258144    | 1.72125  | 0.89405 | 0.994 |
| <b>GO-4.5wt% PDASA</b>  |             |          |         |       |
| N <sub>2</sub>          | 0.003589    | 0.00131  | 1       | 0.999 |
| CH <sub>4</sub>         | 0.012041    | 0.00394  |         | 0.999 |
| CO <sub>2</sub>         | 3.694794    | 2.27132  | 0.83429 | 0.989 |
| H <sub>2</sub> S        | 4.789341    | 1.53676  | 0.91312 | 0.996 |
| <b>GO-6.0wt% PDASA</b>  |             |          |         |       |
| N <sub>2</sub>          | 0.003887    | 0.00159  | 1       | 0.999 |
| CH <sub>4</sub>         | 0.013281    | 0.00473  |         | 0.999 |
| CO <sub>2</sub>         | 3.811163    | 2.12759  | 0.85396 | 0.994 |
| H <sub>2</sub> S        | 4.2226      | 1.29829  | 0.94332 | 0.998 |
| <b>GO-7.5wt% PDASA</b>  |             |          |         |       |
| N <sub>2</sub>          | 0.003946    | 0.0016   | 1       | 0.999 |
| CH <sub>4</sub>         | 0.013637    | 0.00492  |         | 0.999 |
| CO <sub>2</sub>         | 3.187251    | 1.37293  | 0.88646 | 0.993 |
| H <sub>2</sub> S        | 3.697801    | 1.07954  | 0.94362 | 0.995 |

## 2. Logarithmic form of MSD-t curves

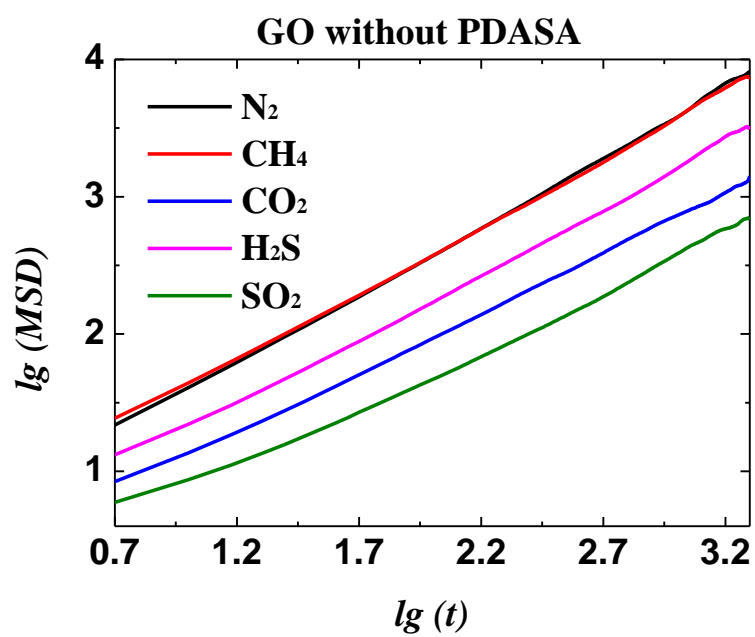

Figure S1. The  $\lg(MSD)$ - $\lg(t)$  curve for the transport of variable gases through pure GO and GO-7.5wt%PDASA membranes.

### 3. Separation performance of different gas through GO membranes

Table S2 The solubility coefficient, diffusion coefficient and permeability with the typically reported unit.

| Gases                   | S ( $\text{cm}^3(\text{STP})\cdot\text{cm}^{-3}\cdot\text{mmHg}$ ) | D ( $10^{-7} \text{ cm}^2\cdot\text{s}^{-1}$ ) | P (Barrer) |
|-------------------------|--------------------------------------------------------------------|------------------------------------------------|------------|
| <b>GO without PDASA</b> |                                                                    |                                                |            |
| N <sub>2</sub>          | 0.099598                                                           | 699.9205                                       | 69.710     |
| CH <sub>4</sub>         | 0.299538                                                           | 662.4247                                       | 198.42     |
| CO <sub>2</sub>         | 91.00181                                                           | 150.2325                                       | 13671.42   |
| H <sub>2</sub> S        | 103.5835                                                           | 210.2658                                       | 21780.07   |
| <b>GO-1.5wt% PDASA</b>  |                                                                    |                                                |            |
| N <sub>2</sub>          | 0.102874                                                           | 553.2705                                       | 56.92      |
| CH <sub>4</sub>         | 0.315006                                                           | 547.9411                                       | 172.60     |
| CO <sub>2</sub>         | 117.0023                                                           | 141.2156                                       | 16522.55   |
| H <sub>2</sub> S        | 128.8815                                                           | 198.2641                                       | 25552.57   |
| <b>GO-3.0wt% PDASA</b>  |                                                                    |                                                |            |
| N <sub>2</sub>          | 0.092981                                                           | 458.2813                                       | 42.61      |
| CH <sub>4</sub>         | 0.300666                                                           | 443.8846                                       | 133.46     |
| CO <sub>2</sub>         | 124.8961                                                           | 93.3594                                        | 11660.22   |
| H <sub>2</sub> S        | 145.329                                                            | 146.3784                                       | 21273.03   |
| <b>GO-4.5wt% PDASA</b>  |                                                                    |                                                |            |
| N <sub>2</sub>          | 0.10064                                                            | 280.9014                                       | 28.27      |
| CH <sub>4</sub>         | 0.337283                                                           | 253.8995                                       | 85.64      |
| CO <sub>2</sub>         | 103.5978                                                           | 70.132                                         | 7265.52    |
| H <sub>2</sub> S        | 134.2876                                                           | 128.0338                                       | 17193.36   |
| <b>GO-6.0wt% PDASA</b>  |                                                                    |                                                |            |
| N <sub>2</sub>          | 0.110555                                                           | 288.3706                                       | 31.88      |
| CH <sub>4</sub>         | 0.37771                                                            | 252.1763                                       | 95.25      |
| CO <sub>2</sub>         | 108.3851                                                           | 37.7374                                        | 4090.17    |
| H <sub>2</sub> S        | 120.0859                                                           | 78.1211                                        | 9381.25    |
| <b>GO-7.5wt% PDASA</b>  |                                                                    |                                                |            |
| N <sub>2</sub>          | 0.113789                                                           | 230.3564                                       | 26.21      |
| CH <sub>4</sub>         | 0.393263                                                           | 219.3084                                       | 86.25      |
| CO <sub>2</sub>         | 91.91672                                                           | 20.6643                                        | 1899.40    |
| H <sub>2</sub> S        | 106.6404                                                           | 16.8647                                        | 1798.46    |

#### 4. Performance comparison

Table S3 Performance comparison for separations of CO<sub>2</sub>/CH<sub>4</sub> and (CO<sub>2</sub>+H<sub>2</sub>S)/CH<sub>4</sub>.

| P <sub>CO2</sub> (Barrer) | $\alpha_{\text{CO}_2/\text{CH}_4}$ | P <sub>(CO2+H2S)</sub> (Barrer) | $\alpha_{(\text{CO}_2+\text{H}_2\text{S})/\text{CH}_4}$ | Reference                      |
|---------------------------|------------------------------------|---------------------------------|---------------------------------------------------------|--------------------------------|
| 864                       | 30.7                               | 1180                            | 42                                                      | [1]                            |
| 547                       | 28.2                               | 948                             | 48.9                                                    | [2]                            |
| 599                       | 23.8                               | 1047                            | 42.4                                                    |                                |
| 385                       | 15.2                               | 737                             | 29                                                      | [3]                            |
| 193                       | 18.2                               | 365                             | 34.4                                                    |                                |
| 84.3                      | 24.4                               | 152.3                           | 44                                                      | [4]                            |
| 92                        | 14.9                               | 228                             | 40.9                                                    | [5]                            |
| 76.1                      | 14.2                               | 188.1                           | 35.2                                                    | [6]                            |
| 26                        | 22.3                               | 52.5                            | 45                                                      | [7]                            |
| 142.2                     | 10.35                              | 418                             | 30.43                                                   | [8]                            |
| 100.2                     | 15.24                              | 262.7                           | 39.96                                                   |                                |
| 332                       | 25.7                               | 914.9                           | 40.5                                                    | [9]                            |
| 246.5                     | 26.5                               | 682.4                           | 41.4                                                    |                                |
| 206.9                     | 30                                 | 582.2                           | 46.6                                                    |                                |
| 495.1                     | 19                                 | 796.1                           | 50.2                                                    |                                |
| 473.5                     | 24.4                               | 671.8                           | 39.7                                                    | [10]                           |
| 496.3                     | 25                                 | 823.2                           | 41.5                                                    |                                |
| 543.2                     | 27.1                               | 936.2                           | 46.7                                                    |                                |
| 587.9                     | 29.3                               | 1057.7                          | 52.8                                                    |                                |
| 432.8                     | 26.3                               | 702.3                           | 42.5                                                    |                                |
| 460.4                     | 30.3                               | 747.8                           | 49.2                                                    |                                |
| 460.4                     | 30.3                               | 137.9                           | 52.1                                                    |                                |
| 95.6                      | 36.1                               | 196.1                           | 56.2                                                    |                                |
| 135                       | 38.7                               | 225.9                           | 66.1                                                    |                                |
| 11660.2                   | 87.4                               | 32933.3                         | 246.8                                                   | GO-3.0wt% PDASA<br>(This work) |
| 7265.5                    | 84.8                               | 24458.9                         | 285.7                                                   | GO-4.5wt% PDASA<br>(This work) |

#### References

1. Qian, Q.; Wright, A.M.; Lee, H.; Dincă, M.; Smith, Z.P. Low-temperature H<sub>2</sub>S/CO<sub>2</sub>/CH<sub>4</sub> separation in mixed-matrix membranes containing MFU-4. *Chem. Mater.* **2021**, *33*, 6825–6831.
2. Liu, G.; Cadiau, A.; Liu, Y.; Adil, K.; Chernikova, V.; Carja, I.-D.; Belmabkhout, Y.; Karunakaran, M.; Shekhah, O.; Zhang, C.; et al. Enabling fluorinated MOF-based membranes for simultaneous removal of H<sub>2</sub>S and CO<sub>2</sub> from natural gas. *Angew. Chem. Int. Ed.* **2018**, *57*, 14811–14816.

3. Ahmad, M.Z.; Peters, T.A.; Konnertz, N.M.; Visser, T.; Téllez, C.; Coronas, J.; Fila, V.; de Vos, W.M.; Benes, N.E. High-pressure CO<sub>2</sub>/CH<sub>4</sub> separation of Zr-MOFs based mixed matrix membranes. *Sep. Purif. Technol.* **2020**, *230*, 115858.
4. Yahaya, G.O.; Hayek, A.; Alsamah, A.; Shalabi, Y.A.; Ben Sultan, M.M.; Alhajry, R.H. Copolyimide membranes with improved H<sub>2</sub>S/CH<sub>4</sub> selectivity for high-pressure sour mixed-gas separation. *Sep. Purif. Technol.* **2021**, *272*, 118897.
5. Hayek, A.; Alsamah, A.; Alaslai, N.; Maab, H.; Qasem, E.A.; Alhajry, R.H.; Alyami, N.M. Unprecedented Sour Mixed-Gas Permeation Properties of Fluorinated Polyazole-Based Membranes. *ACS Appl. Polym. Mater.* **2020**, *2*, 2199–2210.
6. Hayek, A.; Yahaya, G.O.; Alsamah, A.; Alghannam, A.A.; Jutaily, S.A.; Mokhtari, I. Pure- and sour mixed-gas transport properties of 4,4'-methylenebis(2,6-diethylaniline)-based copolyimide membranes. *Polymer* **2019**, *166*, 184–195.
7. Hayek, A.; Alsamah, A.; Yahaya, G.O.; Qasem, E.A.; Alhajry, R.H. Post-synthetic modification of CARDO-based materials: application in sour natural gas separation. *J. Mater. Chem. A* **2020**, *8*, 23354–23367.
8. Alghannam, A.A.; Yahaya, G.O.; Hayek, A.; Mokhtari, I.; Saleem, Q.; Sewdan, D.A.; Bahamdan, A.A. High pressure pure- and mixed sour gas transport properties of Cardo-type block co-polyimide membranes. *J. Membr. Sci.* **2018**, *553*, 32–42.
9. Liu, Y.; Liu, Z.; Liu, G.; Qiu, W.; Bhuwania, N.; Chinn, D.; Koros, W.J. Surprising plasticization benefits in natural gas upgrading using polyimide membranes. *J. Membr. Sci.* **2020**, *593*, 117430.
10. Liu, G.; Chernikova, V.; Liu, Y.; Zhang, K.; Belmabkhout, Y.; Shekhah, O.; Zhang, C.; Yi, S.; Eddaoudi, M.; Koros, W.J. Mixed matrix formulations with MOF molecular sieving for key energy-intensive separations. *Nat. Mater.* **2018**, *17*, 283–289.
